# Supplementary material for: Hepatoprotection of a Standardized Extract of Cultured Lentinula edodes Mycelia against Liver Injury Induced by Ischemia-Reperfusion and Partial Hepatectomy
Source: MDPI journal article supplement (doi:10.3390/nu16020256), 2024-01-14
Supplement: s1 [file s1]

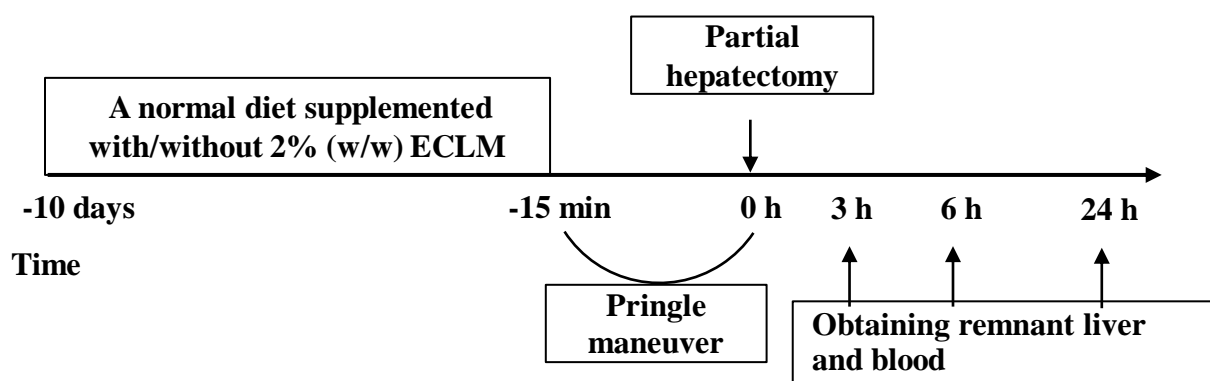

### Sampling Experiment

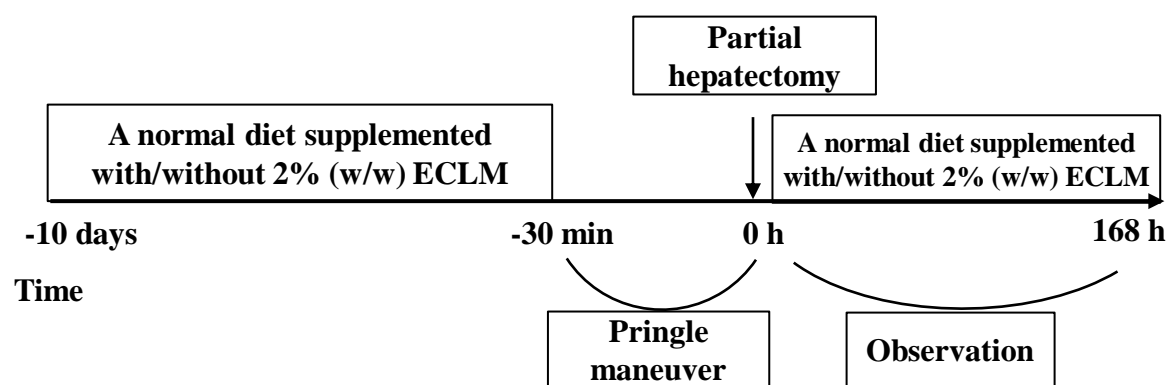

### Survival Experiment

Figure S1

**Supplementary Table S1 Primers used for RT-PCR to detect mRNA**

|               | Sequence (5' → 3')        | Direction | Length<br>(bp) |
|---------------|---------------------------|-----------|----------------|
| CXCL-1        | GCCAAGCCACAGGGGCGCCCGT    | Forward   | 231            |
|               | ACTTGGGGACACCCTTTAGCATC   | Reverse   |                |
| TNF- $\alpha$ | TCCCAACAAGGAGGAGAAGTTCC   | Forward   | 275            |
|               | GGCAGCCTTGTCCTTGAAGAGA    | Reverse   |                |
| IL-10         | GCAGGACTTTAAGGGTTACTTGG   | Forward   | 245            |
|               | CCTTTGTCTTGGAGCTTATTAAA   | Reverse   |                |
| MCL1          | CTGGGGCAGGATTGTGACTC      | Forward   | 169            |
|               | CACAAACCCATCCCAGCCTCTTTG  | Reverse   |                |
| HGF           | GCTACACTGGATTGATCAACGC    | Forward   | 169            |
|               | CCATAATCTCCCTCACAAGGTC    | Reverse   |                |
| iNOS          | CCAACCTGCAGGTCTTCGATG     | Forward   | 257            |
|               | GTCGATGCACAACCTGGGTGAAC   | Reverse   |                |
| eNOS          | CAGCCCTAAGACCTATGTGCAAG   | Forward   | 219            |
|               | TAGCGTTGCTGATCCCGCAGCA    | Reverse   |                |
| EF            | TCTGGTTGGAATGGTGACAACATGC | Forward   | 335            |
|               | CCAGGAAGAGCTTCACTCAAAGCTT | Reverse   |                |

*RT-PCR* reverse transcription-polymerase chain reaction, *bp* base pairs, *EF* elongation factor 1 $\alpha$

**Supplementary Table S2 Histological index in the liver of the HIRI+PH-treated rats**

|                                            |              | <i>P</i> value<br>HIRI+PH<br>vs<br>HIRI+PH and ECLM |
|--------------------------------------------|--------------|-----------------------------------------------------|
| Average ± SD                               |              |                                                     |
| <i>Suzuki score</i>                        |              |                                                     |
| 3 h                                        |              |                                                     |
| HIRI+PH                                    | 4.0 ± 0.0    | 1.000                                               |
| HIRI+PH and ECLM                           | 5.3 ± 3.8    |                                                     |
| 6 h                                        |              |                                                     |
| HIRI+PH                                    | 8.0 ± 2.6    | 0.010*                                              |
| HIRI+PH and ECLM                           | 1.8 ± 0.4    |                                                     |
| 24 h                                       |              |                                                     |
| HIRI+PH                                    | 3.2 ± 0.7    | 0.879                                               |
| HIRI+PH and ECLM                           | 4.8 ± 2.9    |                                                     |
| <i>TUNEL-positive cells/mm<sup>2</sup></i> |              |                                                     |
| 6 h                                        |              |                                                     |
| HIRI+PH                                    | 145.9 ± 45.9 | 0.004**                                             |
| HIRI+PH and ECLM                           | 22.3 ± 14.0  |                                                     |
| <i>MPO-positive cells/mm<sup>2</sup></i>   |              |                                                     |
| 6 h                                        |              |                                                     |
| HIRI+PH                                    | 79.2 ± 29.5  | 0.020*                                              |
| HIRI+PH and ECLM                           | 22.3 ± 11.2  |                                                     |
| <i>Ki-67-positive nuclei (%)</i>           |              |                                                     |
| 24 h                                       |              |                                                     |
| HIRI+PH                                    | 1.9 ± 0.6    | 0.007**                                             |
| HIRI+PH and ECLM                           | 4.3 ± 1.1    |                                                     |

\* *p* < 0.05 and \*\* *p* < 0.01 versus HIRI+PH alone.
